# Supplementary material for: Denudation systematics inferred from in situ cosmogenic 10 Be concentrations in fine (50–100 µm) and medium (100–250 µm) sediments of the Var River basin, southern French Alps
Source: Copernicus journal article supplement (doi:10.5194/esurf-7-1059-2019), 2019-12-13
Supplement: Supplementary file 1 [file esurf-7-1059-2019-supplement.zip]

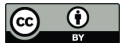

## *Supplement of*

# **Denudation systematics inferred from in situ cosmogenic $^{10}\text{Be}$ concentrations in fine (50–100 $\mu\text{m}$ ) and medium (100–250 $\mu\text{m}$ ) sediments of the Var River basin, southern French Alps**

**Apolline Mariotti et al.**

*Correspondence to:* Apolline Mariotti ([apolline.mariotti@univ-lorraine.fr](mailto:apolline.mariotti@univ-lorraine.fr))

- [esurf-7-1059-2019-supplement-title-page.pdf](#)
- [ESurf\\_Mariotti\\_Sup\\_Info](#)
  - [ESurf\\_Mariotti\\_Raw\\_Data.xlsx](#)
  - [ESurf\\_Supp\\_Mariotti.docx](#)
  - [ESurf\\_Mariotti\\_Raw\\_Data.xlsx](#)

The copyright of individual parts of the supplement might differ from the CC BY 4.0 License.
